# Supplementary material for: Do We Need Public Green Spaces Accessibility Standards for the Sustainable Development of Urban Settlements? The Evidence from Wrocław, Poland
Source: MDPI journal article supplement (doi:10.3390/ijerph20043067), 2023-02-09
Supplement: s1 [file s1]

**Table S1.** Characteristics of public green spaces (PGS) localised in the study area and the buffer zones.

| Type of PGS | No | Surface [ha] | Name                       | Orthophotomap with PGS localisation                                                  | Short characteristic                                                                                                                                                                                            | Facilities |                                  |              |                                 |              |                                                                        |                                                                                     |                                                |
|-------------|----|--------------|----------------------------|--------------------------------------------------------------------------------------|-----------------------------------------------------------------------------------------------------------------------------------------------------------------------------------------------------------------|------------|----------------------------------|--------------|---------------------------------|--------------|------------------------------------------------------------------------|-------------------------------------------------------------------------------------|------------------------------------------------|
|             |    |              |                            |                                                                                      |                                                                                                                                                                                                                 | Paths      | Seats: benches or other elements | Play-grounds | Outdoor gyms, fitness equipment | Sport fields | Multifunctional areas for picnics or/and cultural and sport activities | Sculptures and elements of park architecture: pergolas, gazebos, bridges, fountains | Food outlets: restaurants, cafés, bars, kiosks |
| 1           | 2  | 3            | 4                          | 5                                                                                    | 6                                                                                                                                                                                                               | 7          | 8                                | 9            | 10                              | 11           | 12                                                                     | 13                                                                                  | 14                                             |
| PGS I       |    |              |                            |                                                                                      |                                                                                                                                                                                                                 |            |                                  |              |                                 |              |                                                                        |                                                                                     |                                                |
| PGS I       | 1  | 0.07         | Square at Pawia street     |   | Located in the Wojszyce housing estate in the place of the historical centre of the old village, transformed into a public green space with an outdoor gym in 2017 (initiative of the residents of the estate). | +          | +                                | —            | +                               | —            | —                                                                      | —                                                                                   | —                                              |
| PGS I       | 2  | 0.12         | Square at Kosmiczna street |  | Located in the Wojszyce housing estate, established together with single-family housing from the turn of the 1970s and 1980s, upgraded in 2021 (initiative of the residents of the estate).                     | +          | +                                | +            | —                               | —            | —                                                                      | +                                                                                   | —                                              |

| 1        | 2 | 3    | 4                                               | 5                                                                                    | 6                                                                                                                                                                                                                                | 7 | 8 | 9 | 10 | 11 | 12 | 13 | 14 |
|----------|---|------|-------------------------------------------------|--------------------------------------------------------------------------------------|----------------------------------------------------------------------------------------------------------------------------------------------------------------------------------------------------------------------------------|---|---|---|----|----|----|----|----|
| PGS<br>I | 3 | 0.19 | Square at Zawiszy Czarnego and Kwitnaca streets |    | <p>Located in the Wojszyce housing estate, established together with single-family housing development (terraced houses) from the turn of the 1970s and 1980s, upgraded in 2020 (initiative of the residents of the estate).</p> | + | + | + | —  | —  | —  | —  | —  |
| PGS<br>I | 4 | 0.22 | Square at Biwakowa street                       |   | <p>Located in the Wojszyce estate, established together with single-family housing development (terraced houses) in the first decade of the 21st century.</p>                                                                    | + | — | — | —  | —  | —  | —  | —  |
| PGS<br>I | 5 | 0.30 | Square at Skibowa Street                        |  | <p>Located in the Wojszyce estate, established together with the single-family housing development (terraced and semi-detached houses) from the turn of the 1970s and 1980s.</p>                                                 | + | + | — | —  | —  | +  | —  | —  |



| 1        | 2 | 3    | 4                           | 5                                                                                    | 6                                                                                                                                                                                                                               | 7 | 8 | 9 | 10 | 11 | 12 | 13 | 14 |
|----------|---|------|-----------------------------|--------------------------------------------------------------------------------------|---------------------------------------------------------------------------------------------------------------------------------------------------------------------------------------------------------------------------------|---|---|---|----|----|----|----|----|
| PGS<br>I | 6 | 0.32 | Square at Parafialna street | 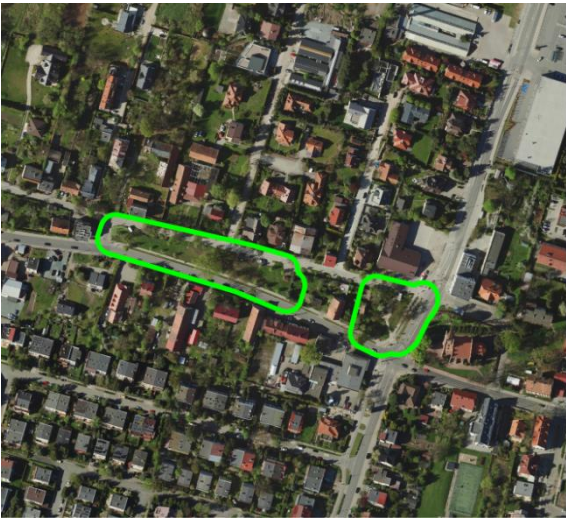   | <p>Located in the Oltaszyn housing estate, established in the old centre of the historic village, near the church, renovated in 2020 (initiative of the residents of the estate).</p>                                           | + | + | — | —  | —  | —  | —  | —  |
| PGS<br>I | 7 | 0.51 | Square at Nefrytowa street  |   | <p>Located in the Oltaszyn housing estate, established together with single-family housing development from the turn of the 1970s and 1980s, partly renovation in 2014 in 2022 (initiative of the residents of the estate).</p> | + | + | + | —  | —  | —  | —  | —  |
| PGS<br>I | 8 | 1.09 | Wojszycki mini park         |  | <p>Located in the Wojszyce housing estate, established as a new public green spaces in 2018 (stage I), 2019 (stage II). (initiative of the residents of the estate)</p>                                                         | + | + | + | —  | —  | +  | —  | —  |



| 1      | 2  | 3    | 4                                   | 5                                                                                    | 6                                                                                                                                                                             | 7 | 8 | 9 | 10 | 11 | 12 | 13 | 14 |
|--------|----|------|-------------------------------------|--------------------------------------------------------------------------------------|-------------------------------------------------------------------------------------------------------------------------------------------------------------------------------|---|---|---|----|----|----|----|----|
| PGS I  | 9  | 1.17 | Gen. T. Rozwadowski mini park       | 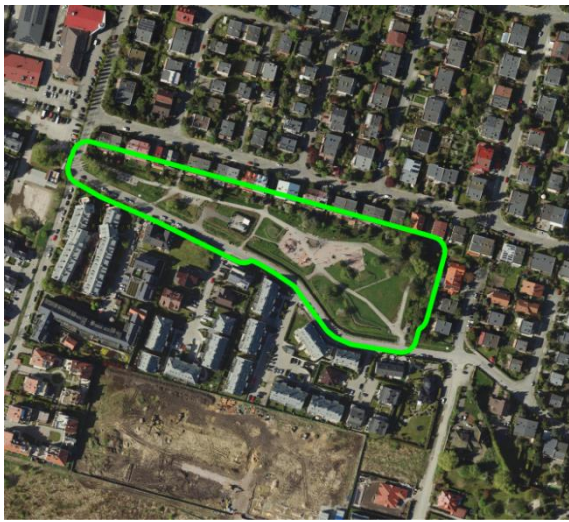   | <p>Located in the Oltaszyn housing estate, established as a new public green spaces in 2016-2018 (initiative of the residents of the estate).</p>                             | + | + | + | +  | —  | +  | —  | —  |
| PGS II |    |      |                                     |                                                                                      |                                                                                                                                                                               |   |   |   |    |    |    |    |    |
| PGS II | 10 | 2.4  | Neighborhood park „Zielony Gaj”     |   | <p>Located in the buffer of the examined housing estates, established as a park in 2018 on the place of informal green space (initiative of the residents of the estate).</p> | + | + | + | +  | —  | +  | —  | —  |
| PGS II | 11 | 2.25 | Neighborhood park at Bardzka street |  | <p>Located in the buffer of the examined housing estates, established in 2016-2017 on the place of informal green space (initiative of the residents of the estate).</p>      | + | + | + | —  | —  | +  | —  | —  |

| 1       | 2  | 3    | 4                            | 5                                                                                    | 6                                                                                                                                                                                                      | 7 | 8 | 9 | 10 | 11 | 12 | 13 | 14 |
|---------|----|------|------------------------------|--------------------------------------------------------------------------------------|--------------------------------------------------------------------------------------------------------------------------------------------------------------------------------------------------------|---|---|---|----|----|----|----|----|
| PGS II  | 12 | 3.68 | Promenade at Koszycka street |    | <p>Located in the Oltaszyn housing estate, a fragment of the historic promenade from the beginning of the 20th century, only part open to the public, requires restoration and revalorisation work</p> | + | — | — | +  | —  | —  | —  | —  |
| PGS III |    |      |                              |                                                                                      |                                                                                                                                                                                                        |   |   |   |    |    |    |    |    |
| PGS III | 13 | 5.06 | „Solar Park”                 |   | <p>Located in the buffer of the examined estates, surrounded by multi-family buildings from the 1970s and 1980s., partially renovated in the second decade of the 21st century.</p>                    | + | + | + | —  | —  | +  | —  | —  |
| PGS III | 14 | 5.62 | „Tarnogajski Park”           |  | <p>Located in the buffer of the examined housing estates, established on the place of historical cemetery, open in 2018.<br/>(initiative of the residents of the estate).</p>                          | + | + | + | +  | —  | +  | —  | —  |



| 1          | 2  | 3     | 4                 | 5                                                                                    | 6                                                                                                                                          | 7 | 8 | 9 | 10 | 11 | 12 | 13 | 14 |
|------------|----|-------|-------------------|--------------------------------------------------------------------------------------|--------------------------------------------------------------------------------------------------------------------------------------------|---|---|---|----|----|----|----|----|
| PGS<br>III | 15 | 12.5  | „Brochowski Park“ |    | Located in the buffer of the examined housing estates, historic old park, renovated and enlarged in the second decade of the 21st century. | + | + | + | +  | +  | +  | +  | +  |
| PGS<br>III | 16 | 23.28 | „South Park“      |   | Located in the buffer of the examined housing estates, historic park created in the second half of the 19th century.                       | + | + | + | +  | +  | +  | +  | +  |
| PGS<br>III | 17 | 24.71 | „Skowroni Park“   |  | Located in the buffer of the examined housing estates, established in the place of a historical cemetery. Open in 1967.                    | + | + | + | +  | +  | +  | —  | —  |
